# Supplementary material for: Determining the optimal maximal and submaximal voluntary contraction tests for normalizing the erector spinae muscles
Source: PeerJ. 2019 Oct 18;7:e7824. doi: 10.7717/peerj.7824 (PMC6802582; doi:10.7717/peerj.7824)
Supplement: Supplemental Information 1 [file peerj-07-7824-s001.xlsx]

## Sheet: Hoja1
FE	45°Fsub	45°Fmax	45°sub	45°max	Hsub	Hmax	B	B45°
35.5866	18.4193	47.1859	32.3608	84.1795	35.0383	100	26.2477	43.5431
43.8702	34.8808	56.5425	43.3934	81.3387	64.1047	100	39.4225	47.8767
40.368	21.2573	55.698	44.8067	90.2304	59.587	100	35.8949	61.3985
42.2179	16.8851	37.2433	28.1389	79.9436	35.0954	100	27.6941	39.0644
53.1765	36.9399	63.4617	53.933	100	55.9095	87.7627	44.6613	51.5118
31.4441	19.5131	71.1378	41.2999	100	34.8917	66.874	24.5229	39.6876
32.1011	23.3605	49.775	43.324	73.8235	44.2399	100	31.5163	40.6698
58.2293	47.506	72.4315	70.9703	78.4649	83.5683	100	54.8131	63.6269
45.2287	24.0575	60.5211	57.5334	93.7933	89.1948	100	30.724	54.762
46.0705	28.5751	71.5532	49.0053	100	49.2625	96.0706	35.4516	57.1017
54.8699	24.6814	67.7066	41.3895	83.2689	58.5769	100	39.4489	51.5871
25.7266	14.3949	46.4903	31.2573	100	46.3449	82.7962	22.5926	38.2304
40.9002	31.0026	76.4836	41.7282	90.9162	53.8171	100	57.9673	86.5547
31.4205	17.8989	41.6948	24.3623	54.0827	54.1096	100	25.5463	45.4604
63.0197	51.635	96.6147	49.2433	84.4069	93.6659	100	49.4009	66.9194
28.7453	23.6247	77.3042	38.1408	100	51.5236	91.5245	41.0604	37.058
55.9148	36.2823	76.5594	37.6815	78.4205	72.4351	100	34.4774	44.6031
60.1912	32.6676	68.2135	55.7833	66.1578	67.5687	100	44.3565	48.3689
39.1342	21.679	67.7376	53.5582	91.3498	62.0877	100	40.0312	45.2934
61.944	27.0909	97.8746	42.4308	96.8796	90.7899	100	39.8319	65.68
62.3463	37.8042	68.9202	79.571	78.7446	62.2119	100	37.9838	63.511
44.6492	23.9463	66.6899	75.3005	75.6328	68.7693	100	59.6704	61.6725
70.3299	36.6351	83.4211	60.2645	100	74.4217	93.3964	53.6992	87.5382
41.9698	23.9803	65.5249	41.2396	100	69.4425	95.8522	32.9595	53.3639
45.3016	41.0484	99.8551	40.7575	80.2872	67.5142	100	39.0947	56.3264
36.1812	44.3258	100	35.321	77.1507	51.136	91.0283	40.864	39.8583
30.7025	19.5411	75.0492	26.8048	81.4103	45.6109	100	28.5911	33.4917
52.2176	31.4663	65.1363	62.5564	90.1547	77.6692	100	42.9021	75.2753
49.2924	32.8023	65.557	55.9301	100	78.9917	94.5356	44.8655	55.311
43.8205	23.7828	79.9259	36.3197	75.9026	39.1613	100	39.7122	55.6278
28.3416	19.9321	65.9871	42.6791	100	59.9704	83.7067	24.1553	31.7624
31.854	19.4331	51.5031	31.8067	62.215	37.8041	100	24.5523	32.0447
40.9182	27.5886	78.3978	40.0948	84.8427	88.6463	100	25.7333	71.9398
37.8316	24.7389	79.8117	36.865	72.0675	67.6571	100	42.5927	62.0457
31.6464	37.4006	100	44.0666	88.6681	64.3113	80.5734	36.3401	57.6946
22.046	15.9159	39.796	33.1603	73.8324	33.5724	100	31.1817	38.3694
54.5326	36.4845	89.9035	58.4322	100	59.1957	95.1899	43.3347	49.13
33.8821	32.304	86.3166	50.016	94.2865	73.1666	100	44.8188	50.7787
